# Supplementary material for: Inducing weak and negative Jahn–Teller distortions to alleviate structural deformations for stable sodium storage
Source: Royal Society of Chemistry journal article supplement (doi:10.1039/d4mh01006j), 2024-01-01
Supplement: d4mh01006j1.pdf [file d4mh01006j1.pdf]

Supporting information

Supporting Information

## **Inducing the Weak and Negative Jahn-Teller Distortions to Alleviate the Structural Deformation for Stable Sodium Storage**

Zishan Hou,<sup>a</sup> Yuanming Liu,<sup>a</sup> Shuyun Yao,<sup>a</sup> Shiyu Wang,<sup>a</sup> Yingjie Ji,<sup>a</sup> Weijie Fu,<sup>a</sup> Jiangzhou Xie,<sup>b</sup> Yi-Ming Yan<sup>a</sup> and Zhiyu Yang<sup>\*a</sup>

<sup>a</sup> State Key Laboratory of Organic-Inorganic Composites, Beijing Advanced Innovation Center for Soft Matter Science and Engineering, Beijing University of Chemical Technology, Beijing, 100029, People's Republic of China

<sup>b</sup> School of Mechanical and Manufacturing Engineering, University of New South Wales, Sydney, New South Wales 2052, Australia

\*Corresponding authors.

E-mail address: [yangzhiyu@mail.buct.edu.cn](mailto:yangzhiyu@mail.buct.edu.cn)

# Supporting information

## Experimental Procedures

### Chemicals and Materials

Potassium carbonate ( $K_2CO_3$ , 99%), Manganese (III) oxide ( $Mn_2O_3$ , 99%) were obtained from Shanghai Macklin Biochemical Co., Ltd. Magnesium oxide ( $MgO$ , 99%) were obtained from Aladdin Industrial Corporation. Anhydrous ( $Na_2SO_4$ ) were purchased from Beijing Tong Guang Fine Chemicals Company. All reagents were used as received without further purification. And all solutions were prepared using ultrapure water (resistance = 18.2 M $\Omega$  cm).

### Fabrication of Electrode Materials

In this work,  $K_{0.5}MnO_2$  and  $K_{0.5}Mn_{0.85}Mg_{0.15}O_2$ , are denoted as KMO and KMMO, respectively. These materials were synthesized using a conventional high temperature solid-state reaction approach, employing stoichiometric precursors of  $K_2CO_3$ ,  $Mn_2O_3$  (99% purity), and  $MgO$  (99% purity). The precursors were meticulously ground in an agate mortar with 5 wt.% excess  $K_2CO_3$ . Subsequently, the powders were subjected to a heating process at 900 °C for 24 hours under an air atmosphere, with a heating rate of 2 °C min<sup>-1</sup>. Following natural cooling to room temperature, the resulting samples were obtained.

### Characterizations

The chemical compositions of the samples were determined by ICP analysis (ICP-OES, Agilent 725-ES). Microstructures were studied using scanning electron microscopy (SEM, FEI Quanta 200) at 20 kV, transmission electron microscopy (TEM; FEI Tecnai G2 20) and HRTEM (JEOL, JEM-2100, 200 kV). Magnetic force microscopy (MFM) technique (Japan Hitachi-AFM5100W) was used to visualize the magnetic properties of synthesized samples using a standard MFM tip coated with CoCr film (Japan Hitachi-AFM5100W), which was pre-magnetized. Magnetic property of samples was measured at room temperature with Physical Property Measurement System (PPMS-9: Quantum Design, San Diego, CA, USA). JEOLJESFA200 EPR spectrometer was used to obtain the electron paramagnetic resonance (EPR) spectra, and operating parameters were 140K, 9064 MHz, 0.998 mW, X-band. The temperature magnetic susceptibility (M-T) curves were obtained using a MPMS3 Quantum Design SQUID physical property measurement system in the temperature region of 2 to 300 K. The in-situ XRD was tested using a Rigaku MiniFlex powder diffractometer (Cu K $\alpha$ ,  $\lambda$  = 0.154056 nm) at a scan rate of 0.02°/step and a scan range of 5 to 30°. Raman spectroscopy was performed on a 532 nm Finder Vista Laser micro-Raman Spectroscopy (Zolix, China). The electronic structure and compositional information on the samples were investigated by X-ray photoelectron spectroscopy (XPS, ESCALAB 250). The soft-XAS measurements were carried out in total electron yield mode under ultra-high vacuum at beamline 4B9B of Beijing Synchrotron Radiation Facility of the Institute of High Energy Physics, Chinese Academy of Sciences. Au 4f<sub>7/2</sub> core level spectra were recorded for the photon energy calibration, and the energy resolution is better than 0.2 eV at room temperature. The electrochemical operando Cell (EC-RAIR-H) is supplied by Beijing Science Star technology Co. Ltd. The Raman spectrum was recorded on a HORIBA Raman microscope with a laser wavelength of 532 nm (LabRAM Aramis, HORIBA Jobin Yvon S.A.S, France) for surface characterization. Raman spectra of the sample (one spectrum per 30 s) were captured while a cyclic voltammetry test at a scan rate of 10 mV s<sup>-1</sup> simultaneously.

### Electrochemical Measurements

Working electrode was prepared by traditional slurry-coating method. 80 wt% active material, 10 wt% acetylene black and 10 wt% polytetrafluoroethylene (PTFE) was mixed and coated onto carbon cloth with an area of 1 cm<sup>2</sup>. The electrode was then heated at 60 °C for 2 hours to evaporate the solvent and used as working electrode. The negative electrode was prepared by mixing active carbon, acetylene black and PTFE with a mass ratio of 8 : 1 : 1. Electrochemical measurements were conducted in a general three-electrode configuration in 1.0 M  $Na_2SO_4$  aqueous electrolyte with Ag/AgCl and a Pt foil as reference electrode and counter electrode, respectively. Cyclic voltammetry (CV) and galvanostatic charge discharge (GCD) experiments were performed to determine the electrochemical properties of the electrodes in a potential window of -0.2 to 1.2 V. All the operating current densities were calculated based on the mass of the active materials Electrochemical

## Supporting information

impedance spectroscopy (EIS) measurements were carried out by applying an AC voltage with 5 mV amplitude in a frequency range from 0.01 Hz to 100 kHz at open potential.

The specific capacitance  $C$  ( $F\ g^{-1}$ ) was calculated based on the GCD curves according to equation<sup>1</sup>:

$$C = \frac{I \times \Delta t}{m \times V} \quad (S1)$$

where  $I$  (A) and  $\Delta t$  (s) are the discharge current and time, respectively,  $m$  (g) represents of the active material's loading mass and  $V$  refers to the charge/discharge potential window.

### Sodium Diffusion Coefficient Calculation

The diffusion coefficient of  $Na^+$  ( $D_{Na^+}$ ) can be obtained from the low frequency line according to the equation<sup>2</sup>:

$$D_{Na^+} = 0.5(RT/AF^2C\sigma)^2 \quad (S2)$$

where  $R$ ,  $T$ ,  $F$ ,  $A$ , and  $C$  are the gas constant, the absolute temperature, the Faraday's constant, the apparent area of the electrode, and the molar concentration of  $Na^+$ , respectively.  $\sigma$  is the Warburg factor following equation:

$$Z' = Re + Rct + \sigma\omega^{-\frac{1}{2}} \quad (S3)$$

where  $Re$  is the resistance between the electrolyte and electrode, and  $Rct$  is the charge transfer resistance. Thus, the slopes of the plot of  $Z'$  vs  $\omega^{-1/2}$  can be used to obtain the values of  $\sigma$ .

### Kinetic Calculation

Capacitance contribution can be qualitatively analyzed according to CV curve, as shown below:

$$i = av^b \quad (S4)$$

where  $i$  and  $v$  are the current density and the potential scan rate, respectively,  $a$  is a constant and  $b$  is a tunable parameter with a value of 0.5-1.0. When the value of  $b$  is close to 1.0, the reaction process is dominated by surface capacitance; when the value of  $b$  is close to 0.5, the reaction process is dominated by diffusion control.

The contribution of capacitance and diffusion limit to the total capacitance is further quantified.

$$i(V) = k_1v + k_2v^{1/2} \quad (S5)$$

where  $k_1$  and  $k_2$  represent capacitive and diffusion contributions, respectively.

### Supercapacitor Devices Measurements.

Supercapacitor Devices Measurements: Asymmetric supercapacitor (ASC) device was fabricated by employing AC and com-MnO<sub>2</sub> as anode and cathode, respectively. Two electrodes were separated by glassy fibrous separator in 1 M Na<sub>2</sub>SO<sub>4</sub> aqueous electrolyte. Cyclic voltammetry (CV) and galvanostatic charge/discharge (GCD) measurements were performed in a potential window of 0 to 2.0 V.

The energy density ( $E$ , Wh kg<sup>-1</sup>) of the ASC is calculated according to S6<sup>3</sup>:

$$E = 0.125 \times C \times V^2 \quad (S6)$$

The power density ( $P$ , W kg<sup>-1</sup>) of the ASC is calculated according to S7:

$$P = \frac{E \times 3600}{t} \quad (S7)$$

where  $t$  (s) is discharge time.

### Computational Details.

All density functional theory (DFT) calculations within spin-polarized frame were performed using the Vienna Ab initio Simulation Package (VASP).<sup>4,5</sup> The elemental core and valence electrons were represented by the projector augmented wave (PAW) method and plane-wave basis functions with a cutoff energy of 400 eV. Generalized gradient approximation with the Perdew-Burke-Ernzerhof (GGA-PBE) exchange-correlation functional was employed in all the calculations.<sup>6</sup> The DFT-D3 empirical correction method was employed to describe van der Waals interactions. Geometry optimizations were performed with the force convergency smaller than 0.07 eV/Å. Monkhorst-Pack k-points of 1×1×1 was applied for all the

## Supporting information

calculations.

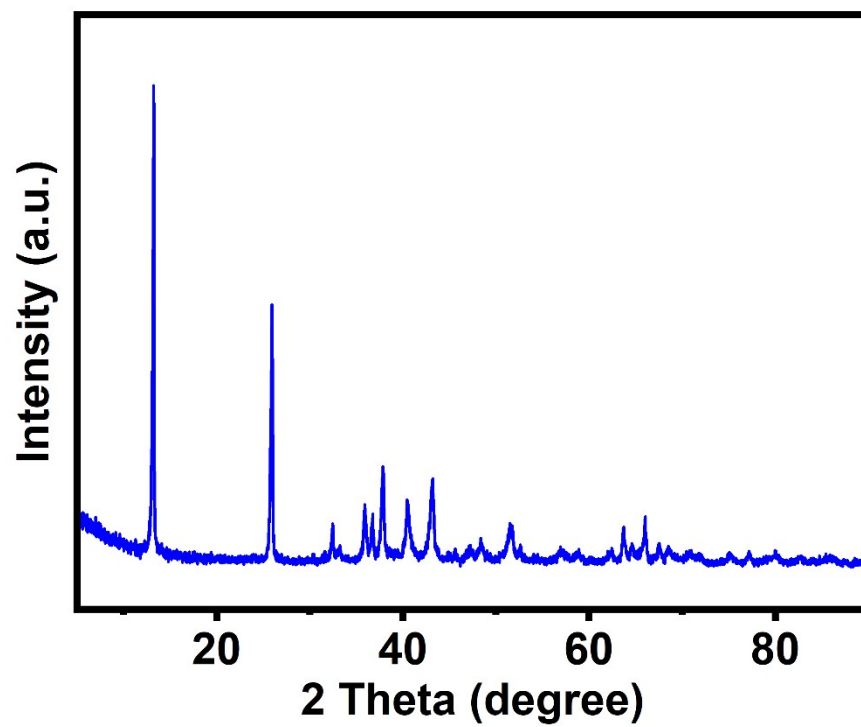

Figure S1. XRD pattern of KMO.

Supporting information

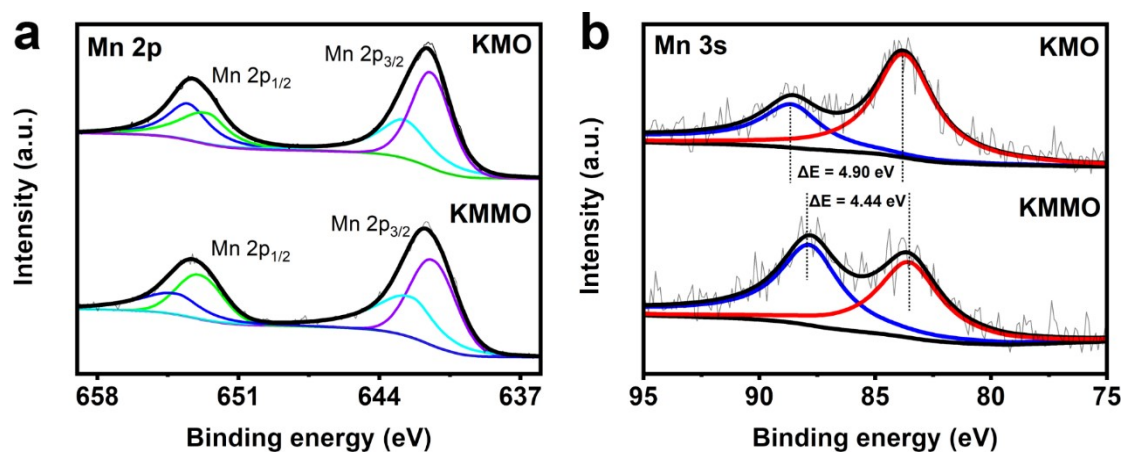

Figure S2. XPS spectra of a) Mn 2p and b) Mn 3s.

## Supporting information

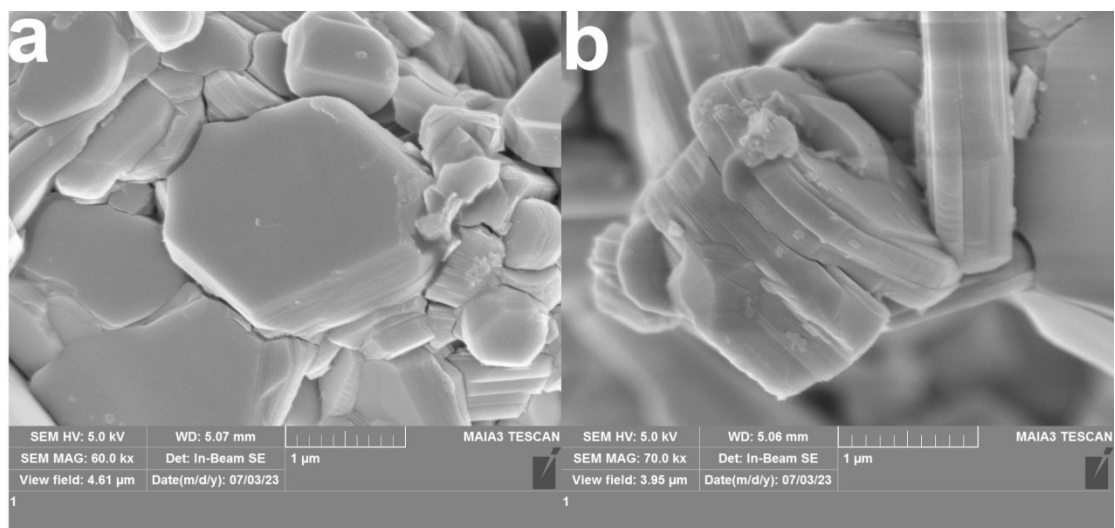

**Figure S3.** SEM images of KMO.

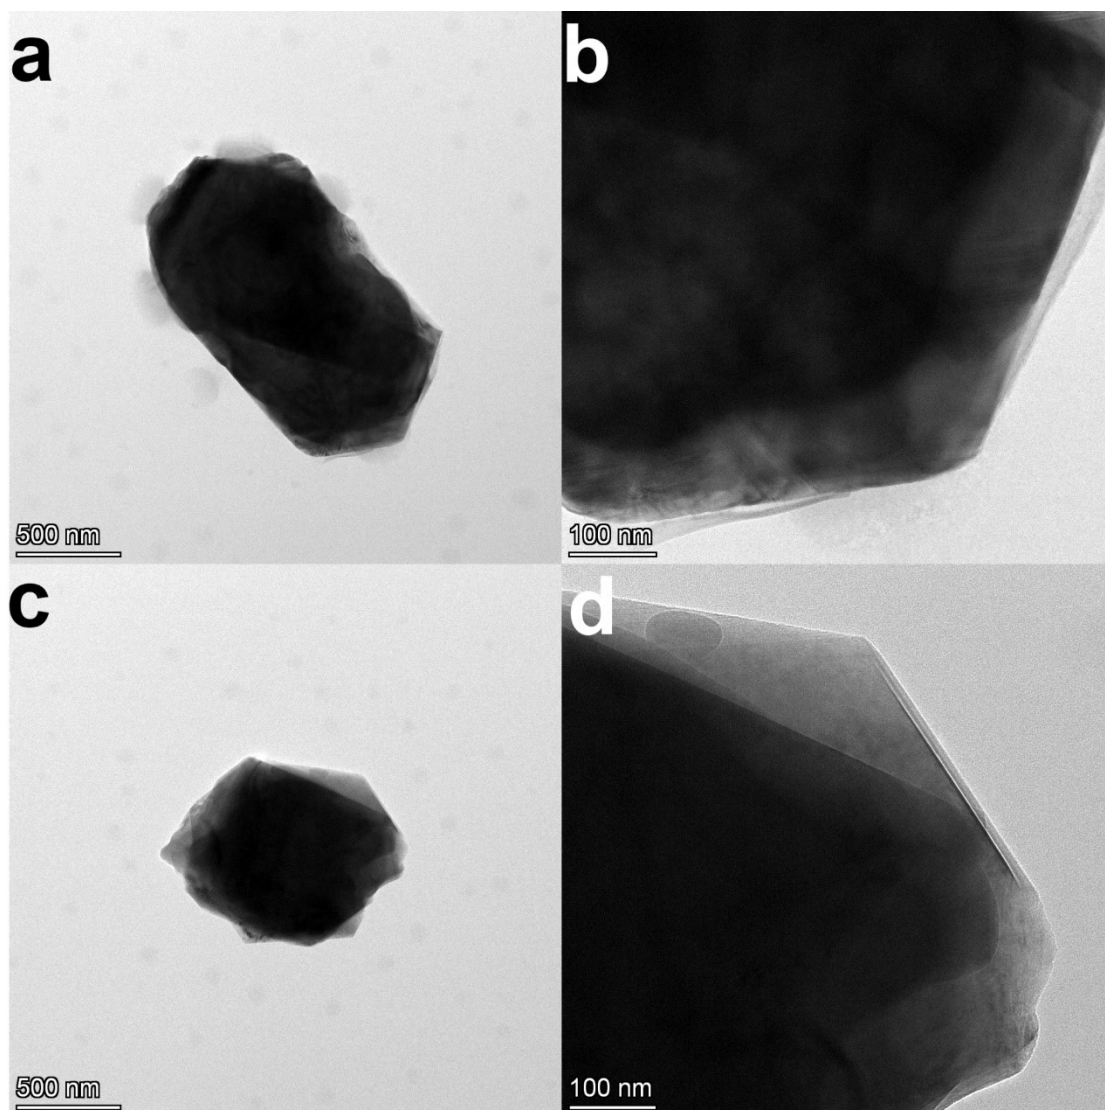

**Figure S4.** TEM images of a, b) KMO and c, d) KMMO.



## Supporting information

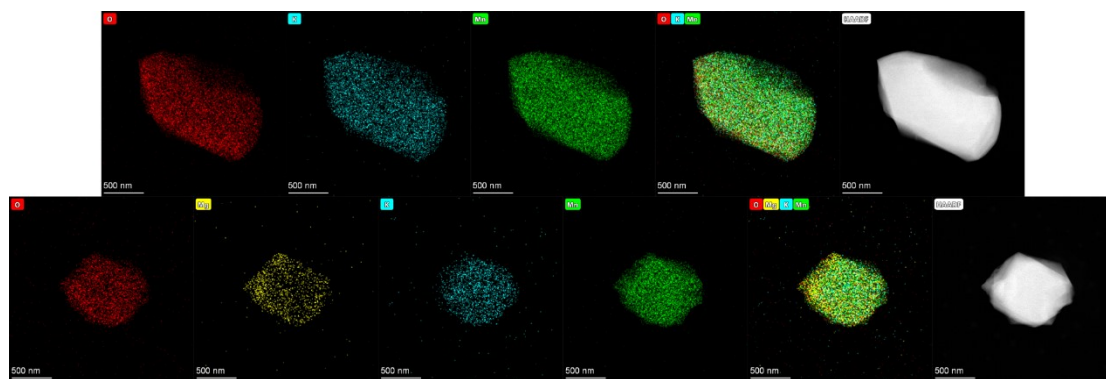

**Figure S5.** Element mapping of KMO and KMMO.

Supporting information

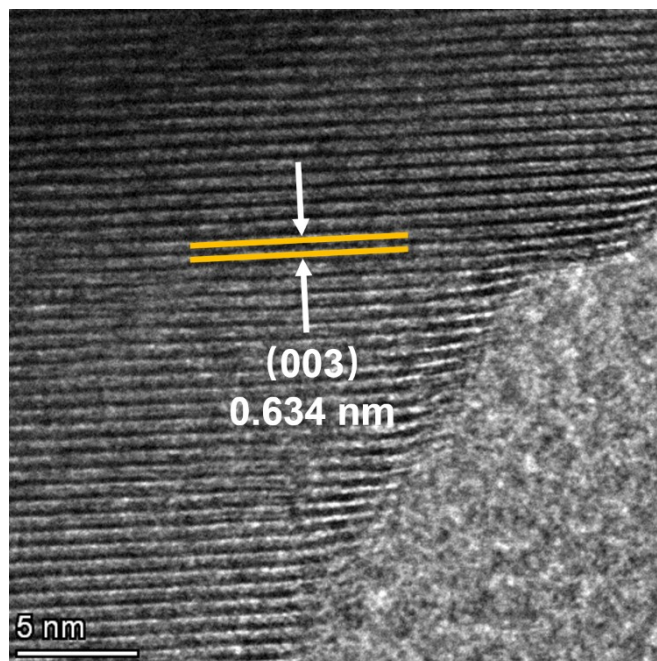

**Figure S6.** HRTEM images of KMO.

## Supporting information

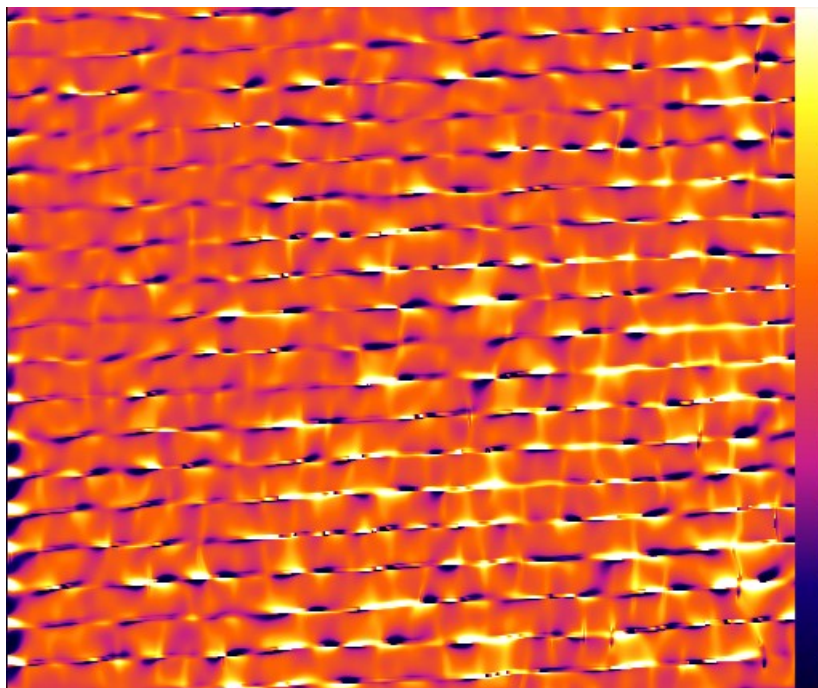

**Figure S7.** Strain image of KMO.

Supporting information

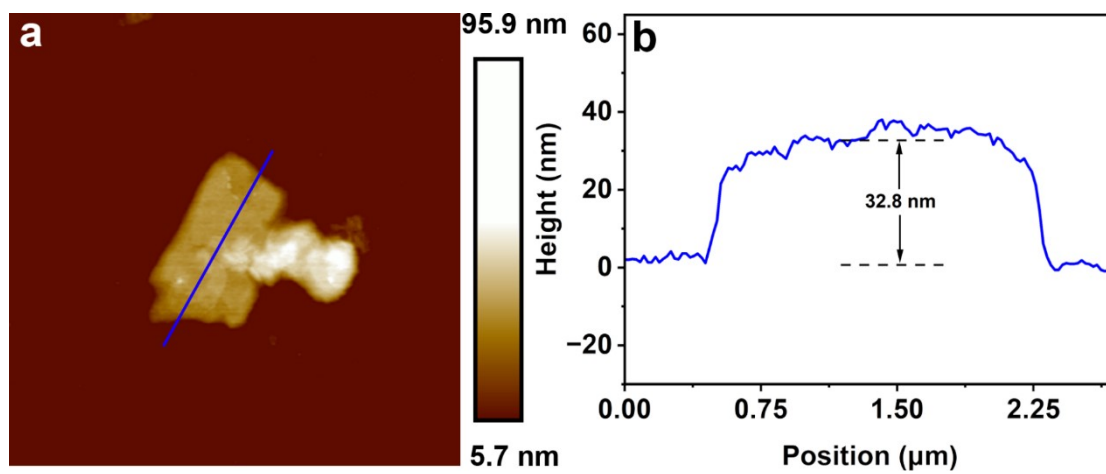

**Figure S8.** AFM image and corresponding profile of KMMO.

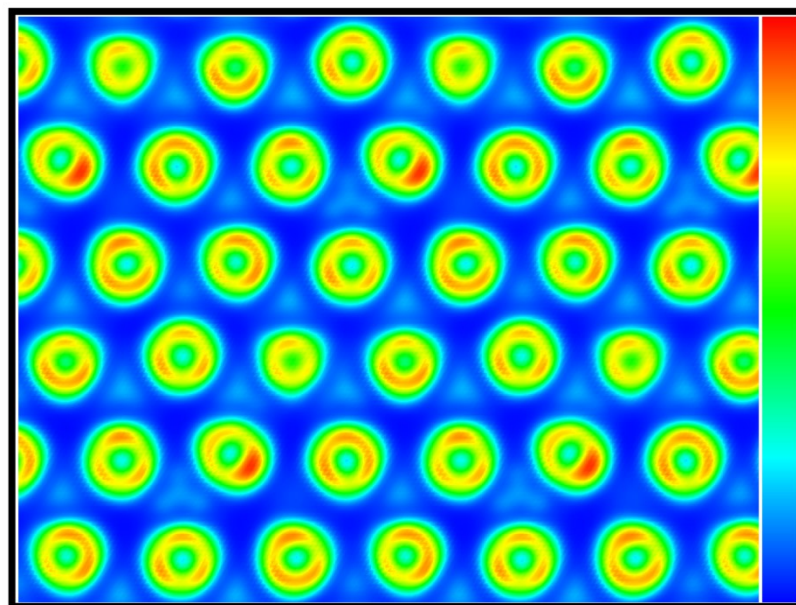

**ELF distribution**

**Figure S9.** ELF of KMO.

## Supporting information

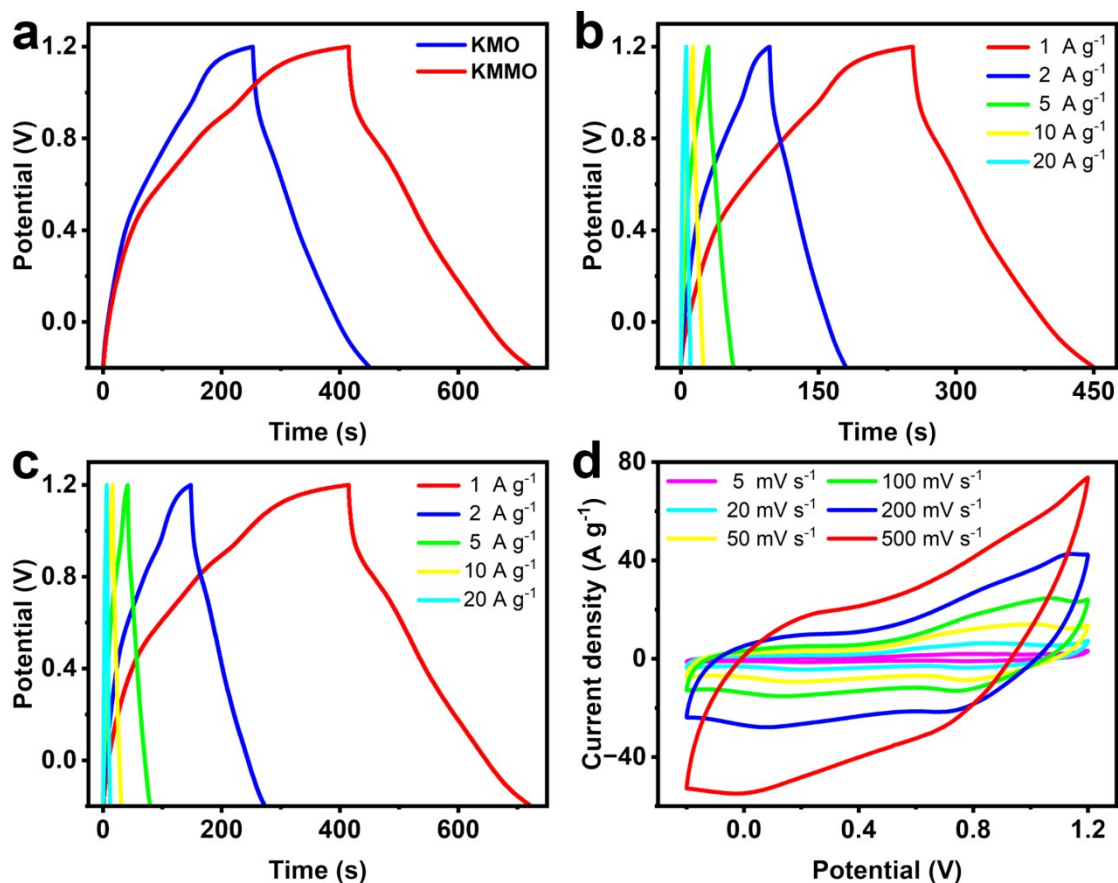

**Figure S10.** a) GCD curves at 1 A g<sup>-1</sup> for KMO and KMMO. GCD curves at different current densities for b) KMO and c) KMMO. d) CV curves at different scan rates for KMO.

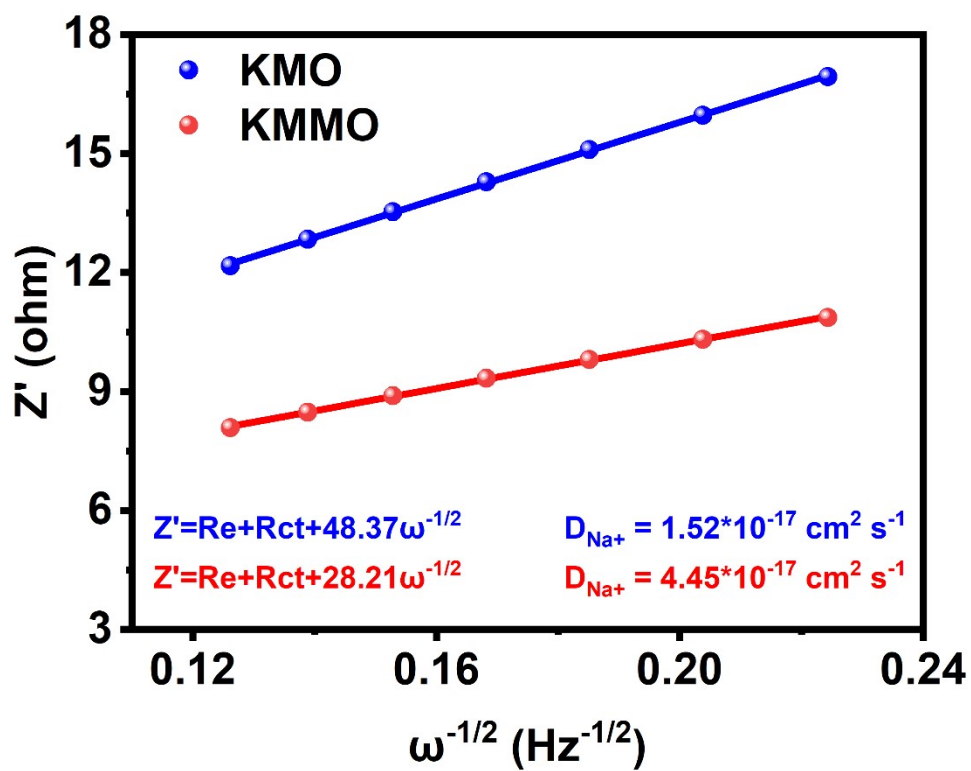

Figure S11. Low frequency  $Z'$ - $\omega^{-1/2}$  plot based on EIS measurement.

## Supporting information

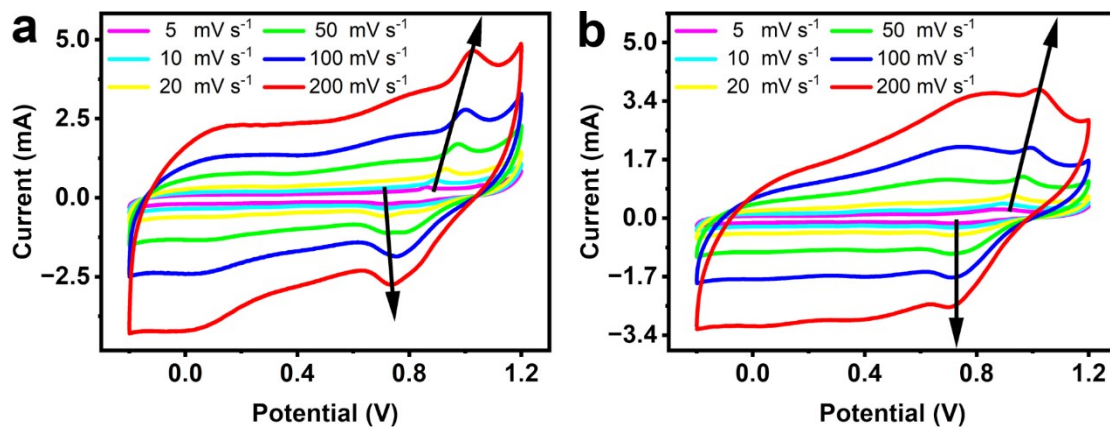

**Figure S12.** CV curves of a) KMO and b) KMMO at different scan rates.



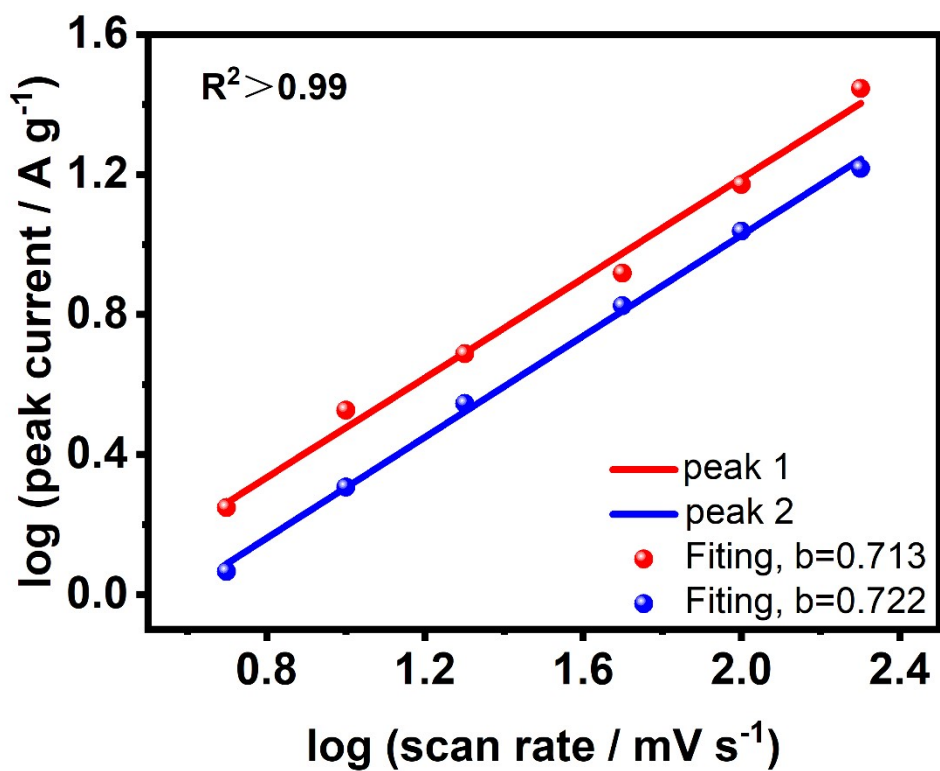

**Figure S13.** Relationship between peak currents and scan rates, and the corresponding b values of KMO.

Supporting information

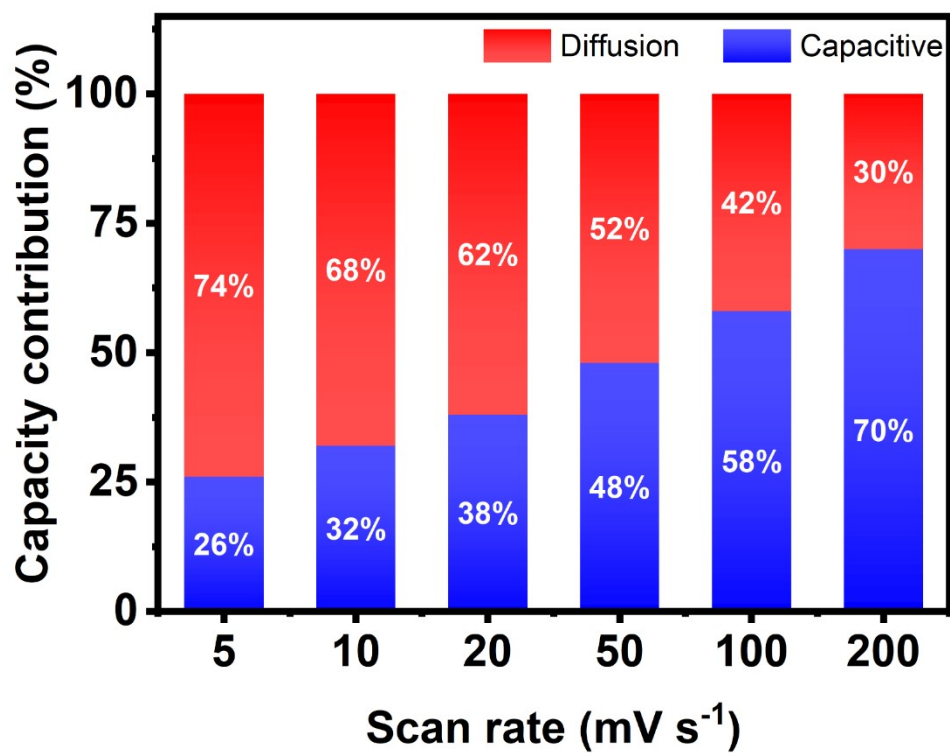

**Figure S14.** The contribution ratio of the capacitive and diffusion-controlled capacity versus scan rates of KMO.

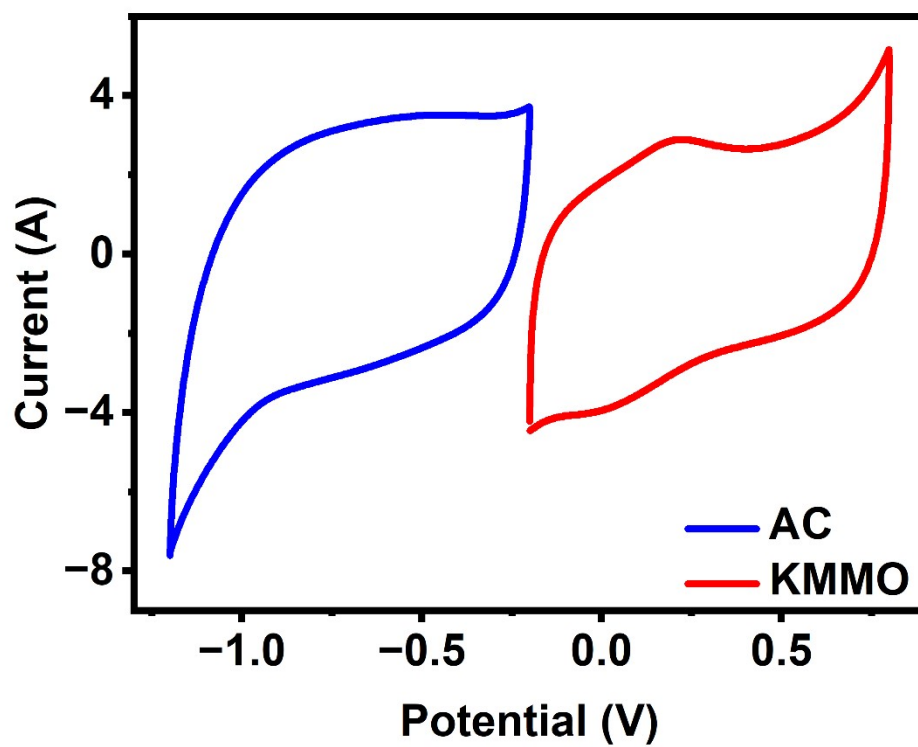

Figure S15. CV curves of KMMO and AC.

## Supporting information

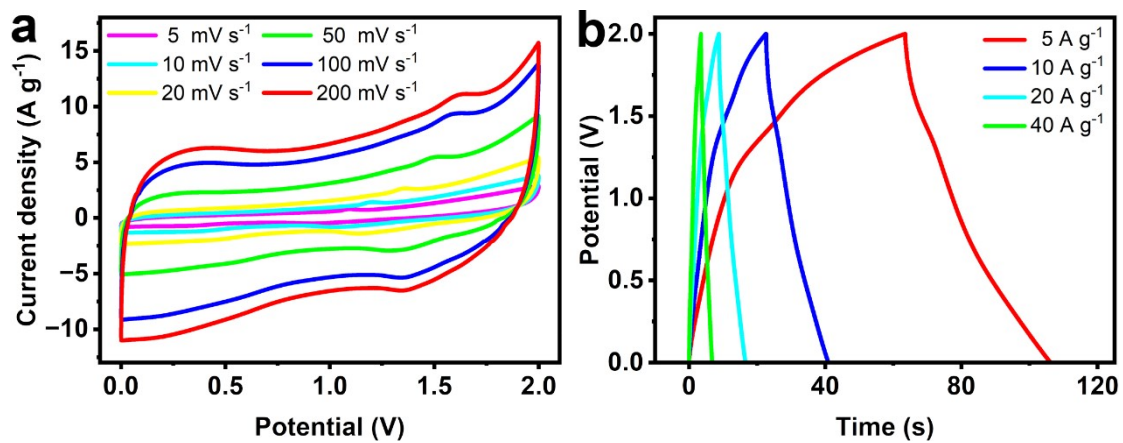

**Figure S16.** a) CV curves at different scan rates and b) GCD curves at different current densities of ASC.

Supporting information

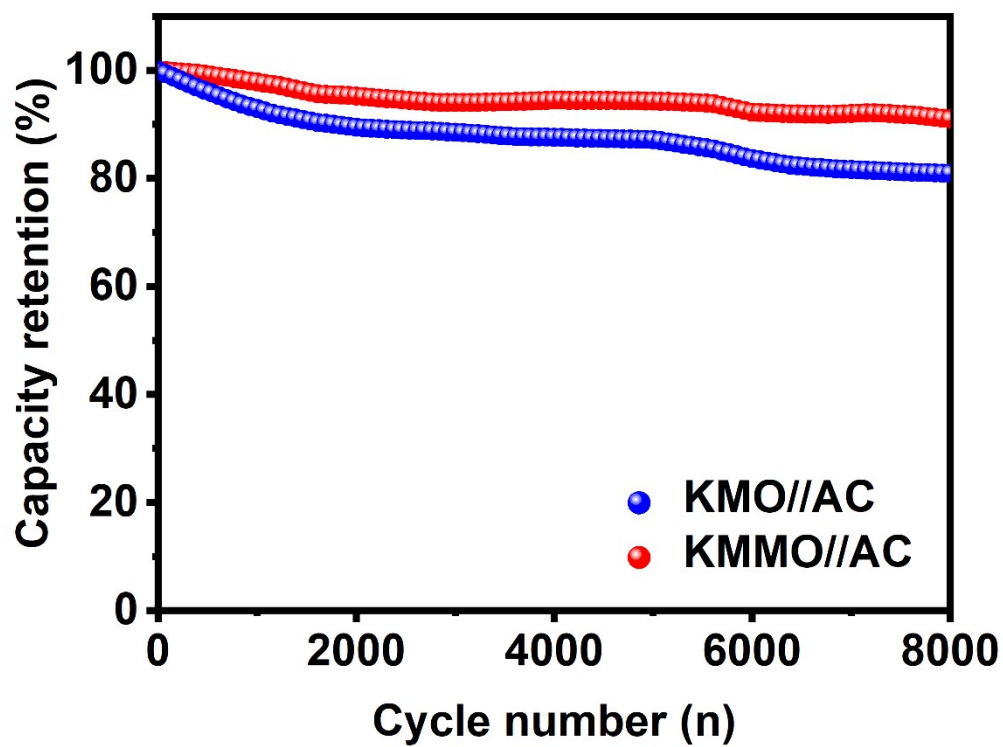

Figure S17. Cycling performance of KMO//AC and KMMO//AC at 5 A g<sup>-1</sup>.

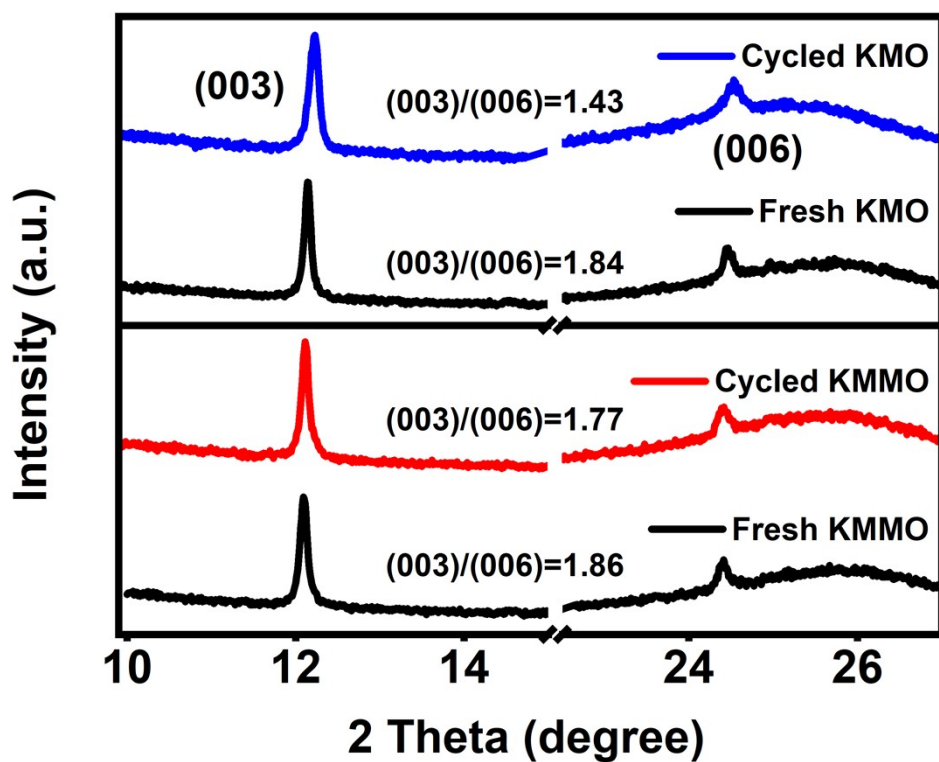

**Figure S18.** The XRD patterns for KMO and KMMO of fresh and after 500 cycles at  $5 \text{ A g}^{-1}$ .

## Supporting information

**Table S1.** ICP-OES results for two samples.

|      | K     | Mn    | Mg    |
|------|-------|-------|-------|
| KMO  | 0.462 | 1.000 | /     |
| KMMO | 0.476 | 1.000 | 0.138 |

## Supporting information

**Table S2.** Fitting results of KMO and KMMO obtained from the EIS curves.

| Sample | R <sub>s</sub> | CPE1                  |       | R <sub>ct</sub> | W0-R  | W0   |      |
|--------|----------------|-----------------------|-------|-----------------|-------|------|------|
|        |                | CPE1-T                | CPE-P |                 |       | W0-T | W0-P |
| KMO    | 3.58           | 8.66×10 <sup>-4</sup> | 0.86  | 8.22            | 58.59 | 0.56 | 0.57 |
| KMMO   | 3.38           | 8.69×10 <sup>-4</sup> | 0.82  | 4.62            | 71.92 | 0.58 | 0.60 |



## Supporting information

### References

- [1] L. Y. Hu, R. Gao, A. Q. Zhang, R. Yang, X. G. Zang, S. Y. Wang, S. Y. Yao, Z. Y. Yang, H. G. Hao, Y. M. Yan, *Nano Energy* **2020**, *74*, 1044891.
- [2] S. Y. Wang, R. Zhao, S. Y. Yao, B. C. Li, R. C. Liu, L. Y. Hu, A. Q. Zhang, R. Yang, X. Liu, Z. Z. Fu, D. W. Wang, Z. Y. Yang, Y. M. Yan, *J. Mater. Chem. A* **2021**, *9*, 23506-23514.
- [3] A. Q. Zhang, R. Gao, L. Y. Hu, X. G. Zang, R. Yang, S. Y. Wang, S. Y. Yao, Z. Y. Yang, H. G. Hao, Y. M. Yan, *Chem. Eng. J.* **2021**, *417*, 129186.
- [4] Kresse, Furthmuller, *Physical review. B, Condensed matter* 1996, *54*, 11169-11186.
- [5] G. K. A, J. F. b. J. C. M. *Science*, **1996**, *6*, 15-50.
- [6] J. P. Perdew, K. Burke, M. J. P. R. L. *Phys. Rev. Lett.* **1998**, *77*, 3865-3868.
